## Integrals of a Lotka-Volterra System of Infinite Species

Yoshiaki ITOH

*The Institute of Statistical Mathematics, Minami-Azabu, Tokyo 106*

(Received July 15, 1988)

A Lotka-Volterra system of infinite species is introduced. Each of the infinite species is represented by a point on a unit circle. The probability density on the circle is given by the solution of the Lotka-Volterra system. Infinite number of conserved quantities are given for the system.

Here we introduce a continuous version of the previous result<sup>1)</sup> on a Lotka-Volterra system of  $2s+1$  variables which has  $s+1$  conserved quantities. A Lotka-Volterra system of  $n$  variables

$$\frac{d}{dt}P_i = P_i(P_{i-1} - P_{i+1})$$

with  $P_{i+n} = P_i$  for each integer  $i$ , has soliton solutions.<sup>2)-6)</sup> Toda lattice<sup>7)</sup> is well known because of its soliton solutions. Toda lattice of  $2m$  variables has  $m$  conserved quantities.<sup>8)-10)</sup> In the discrete version of our system<sup>1),11)-16)</sup> each of  $2s+1$  species interacts with the other  $2s$  species as

$$\frac{d}{dt}P_i = P_i \left( \sum_{j=1}^s P_{i-j} - \sum_{j=1}^s P_{i+j} \right) \quad (1)$$

with  $P_{i+2s+1} = P_i$  for each integer  $i$ . The  $s+1$  conserved quantities for Eq. (1) are given in the previous paper by a combinatorial proof. The conserved quantities for the case  $s=2$  are

$$P_1 + P_2 + P_3 + P_4 + P_5 = I_0,$$

$$P_1 P_2 P_4 + P_2 P_3 P_5 + P_3 P_4 P_1 + P_4 P_5 P_2 + P_5 P_1 P_3 = I_1$$

and

$$P_1 P_2 P_3 P_4 P_5 = I_2.$$

Consider the continuous version of Eq. (1),

$$\frac{d}{dt}P(x, t) = P(x, t) \left( \int_{x-\pi}^x P(y, t) dy - \int_x^{x+\pi} P(y, t) dy \right) \quad (2)$$

with  $P(x, t) = P(x+2\pi, t)$  for each  $x$ .

The conserved quantities are very naturally introduced to this equation. Consider two points on a unit circle  $P$  and  $Q$  whose coordinates are  $(\cos x, \sin x)$  and  $(\cos y, \sin y)$ , respectively. If the counterclockwise way from  $P$  to  $Q$  on the circle is shorter than the clockwise way, we write  $x < y$ . Otherwise, we write  $x > y$ .

Let  $x_1, x_2, \dots, x_{2r+1}$  satisfy the conditions  $0 \leq x_i < 2\pi$ ,  $x_{i+1}, x_{i+2}, \dots, x_{i+r} < x_{i+r+1}$ , for  $i=1, 2, \dots, 2r+1$ . We denote the above conditions on  $x_i$ ,  $i=1, 2, \dots, 2r+1$ , by  $E_r$ .

Consider the integral

$$I_r = \int_{E_r} \dots \int P(x_1, t)P(x_2, t) \dots P(x_{2r+1}, t) dx_1 dx_2 \dots dx_{2r+1}.$$

**THEOREM**

Let  $P(x, t)$  be the solution to Eq. (2).  $I_r$  is the conserved quantities for  $r=0, 1, 2, \dots$ .

*Proof*

We have

$$\begin{aligned} \frac{d}{dt} I_r &= (2r+1) \left( \int_{\substack{E_r \\ y < x_{2r+1}}} \dots \int P(x_1, t)P(x_2, t) \dots P(x_{2r+1}, t)P(y, t) dx_1 dx_2 \dots dx_{2r+1} dy \right. \\ &\quad \left. - \int_{\substack{E_r \\ x_{2r+1} < y}} \dots \int P(x_1, t)P(x_2, t) \dots P(x_{2r+1}, t)P(y, t) dx_1 dx_2 \dots dx_{2r+1} dy \right). \end{aligned}$$

Let us put

$$I_{r,1} = \int_{\substack{E_r \\ x_r + \pi < y \\ y < x_{2r+1} \\ x_{2r+1} < x_{r+1} + \pi}} \dots \int P(x_1, t)P(x_2, t) \dots P(x_{2r+1}, t)P(y, t) dx_1 dx_2 \dots dx_{2r+1} dy,$$

$$I_{r,2} = \int_{\substack{E_r \\ x_{2r+1} + \pi < y \\ y < x_r + \pi}} \dots \int P(x_1, t)P(x_2, t) \dots P(x_{2r+1}, t)P(y, t) dx_1 dx_2 \dots dx_{2r+1} dy,$$

$$I_{r,3} = \int_{\substack{E_r \\ x_r + \pi < x_{2r+1} \\ x_{2r+1} < y \\ y < x_{r+1} + \pi}} \dots \int P(x_1, t)P(x_2, t) \dots P(x_{2r+1}, t)P(y, t) dx_1 dx_2 \dots dx_{2r+1} dy,$$

and

$$I_{r,4} = \int_{\substack{E_r \\ x_{r+1} + \pi < y \\ y < x_{2r+1} + \pi}} \dots \int P(x_1, t)P(x_2, t) \dots P(x_{2r+1}, t)P(y, t) dx_1 dx_2 \dots dx_{2r+1} dy.$$

We have

$$\frac{d}{dt} I_r = (2r+1)(I_{r,1} + I_{r,2} - I_{r,3} - I_{r,4}).$$

The transposition of the variables  $x_{2r+1}$  and  $y$  changes a system of conditions  $E_r$ ,  $x_r + \pi < y$ ,  $y < x_{2r+1}$  and  $x_{2r+1} < x_{r+1} + \pi$  to a system of conditions  $E_r$ ,  $x_r + \pi < x_{2r+1}$ ,  $x_{2r+1} < y$  and  $y < x_{r+1} + \pi$ , which will show  $I_{r,1} = I_{r,3}$ . A cyclic change of variables shows  $I_{r,2} = I_{r,4}$ . Hence we have

$$I_{r,1} = I_{r,3}$$

and

$$I_{r,2} = I_{r,4}.$$

The author is grateful to Professor Tetsuji Miwa, who suggested him an idea for the proof of the theorem. The research was partly supported by Grant-in-Aid 61540171 of the Ministry of Education, Science and Culture of Japan.

- 1) Y. Itoh, Prog. Theor. Phys. **78** (1987), 507.
- 2) J. Moser, Adv. in Math. **16** (1975), 197.
- 3) R. Hirota and J. Satsuma, Prog. Theor. Phys. Suppl. No. 59 (1976), 64.
- 4) M. Wadati, Prog. Theor. Phys. Suppl. No. 59 (1976), 36.
- 5) M. Toda, *Theory of Nonlinear Lattices* (Springer, Berlin, 1981).
- 6) K. Narita, J. Phys. Soc. Jpn. **51** (1982), 1682.
- 7) M. Toda, J. Phys. Soc. Jpn. **22** (1967), 431.
- 8) M. Henon, Phys. Rev. **B9** (1974), 1921.
- 9) H. Flaschka, Phys. Rev. **B9** (1974), 1924.
- 10) K. Sawada and T. Kotera, Prog. Theor. Phys. Suppl. No. 59 (1976), 101.
- 11) Y. Itoh, Ann. Inst. Statist. Math. **25** (1973), 635.
- 12) Y. Itoh, Proc. Japan Acad. **51** (1975), 374.
- 13) Y. Itoh, Seminar on Probability **44** (1977), 141 (in Japanese).
- 14) Y. Itoh, J. Appl. Prob. **16** (1979), 36.
- 15) Y. Itoh and S. Ueda, Proc. Inst. Statist. Math. **28** (1981), 55 (in Japanese with English summary).
- 16) Y. Itoh, Proc. Inst. Statist. Math. **35** (1987), 73 (in Japanese with English summary).
